# Supplementary material for: Deciphering the functional mechanism of zinc ions of PARP1 binding with single strand breaks and double strand breaks
Source: Royal Society of Chemistry journal article supplement (doi:10.1039/d2ra02683j), 2022-01-01
Supplement: d2ra02683j1.pdf [file d2ra02683j1.pdf]

**Supporting information.**

**Deciphering the functional mechanism of zinc ions of  
PARP1 binding with single-strand breaks and double  
strand-strand breaks.**

Shuya Sun<sup>a</sup>, Xin Wang<sup>b</sup>, Rongfeng Lin<sup>a</sup>, Kai Wang<sup>b,c,\*</sup>.

<sup>a</sup>School of Traditional Chinese Medicine, Guangzhou University of Chinese Medicine, Guangzhou 510006, China.

<sup>b</sup>School of agriculture and biology, Zhongkai University of Agriculture and Engineering, Guangzhou 510000, P. R. China.

<sup>c</sup>Abinitio Technology Company, Ltd., Guangzhou 510640, P. R. China.

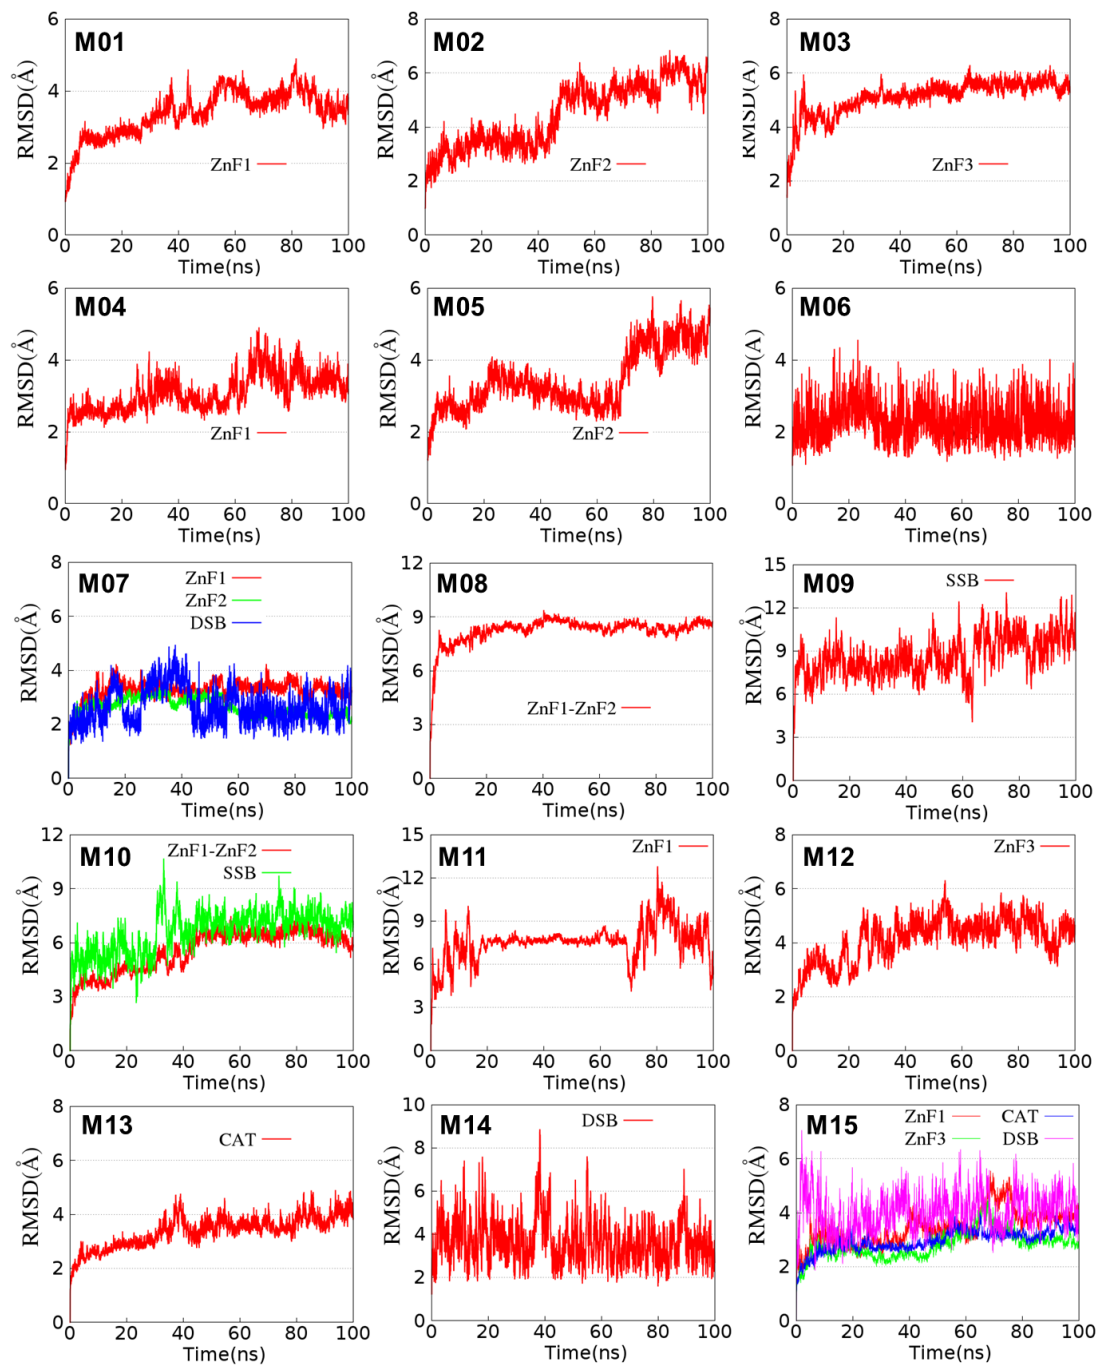

**Fig S1.** RMSDs of all system in Table 1.

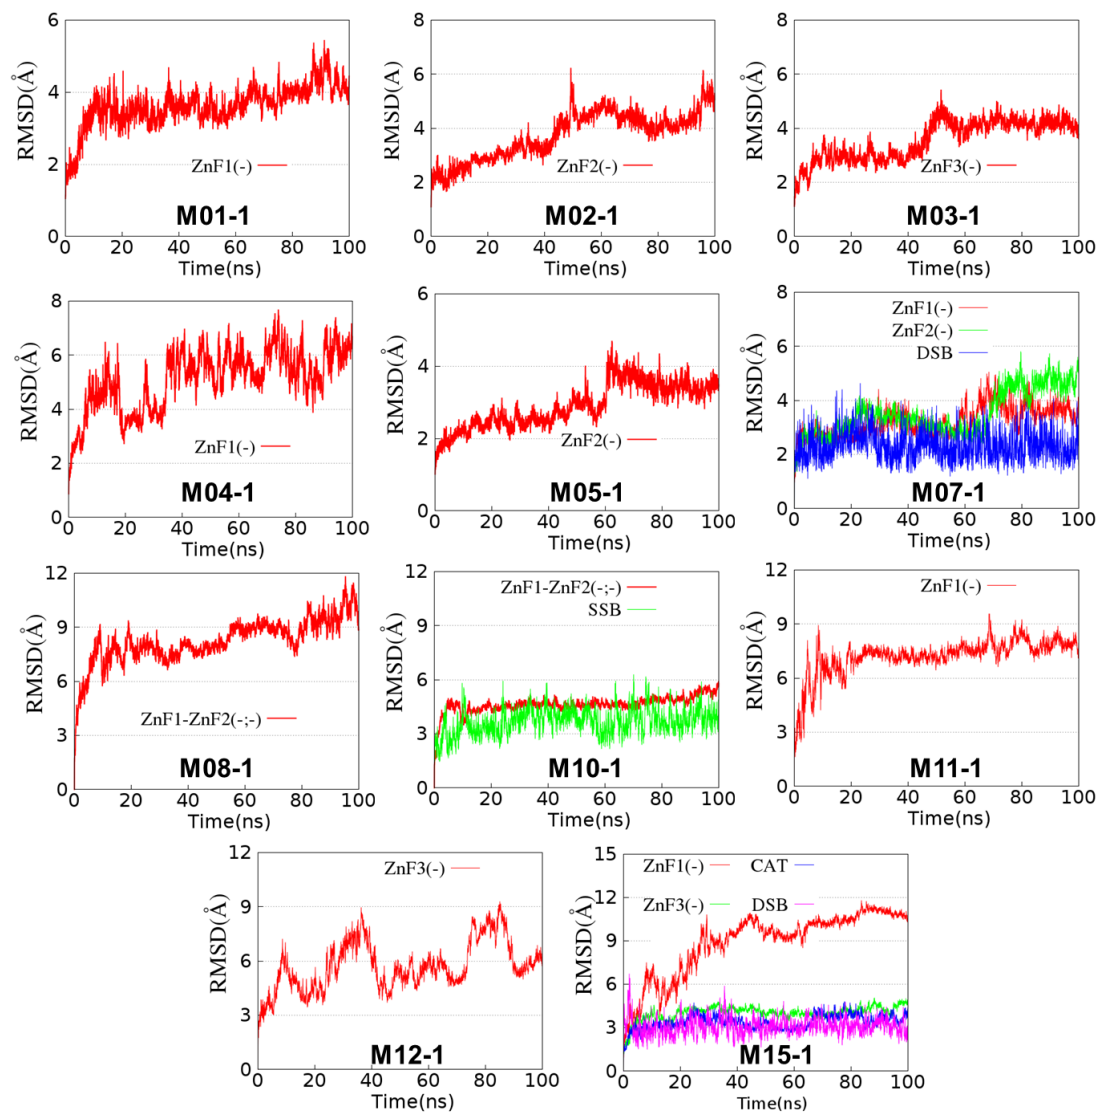

**Fig S2.** RMSDs of all system of Table 2.

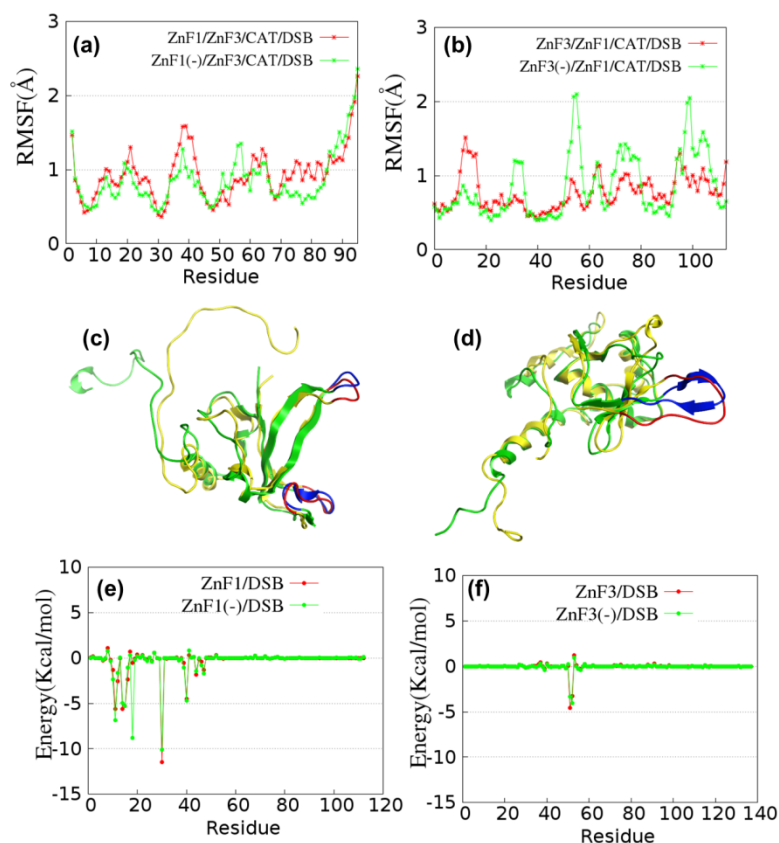

**Fig S3.** The binding interaction analysis between ZnF1(-)/ZnF3(-) and DSB. (a) Comparison of RMSF values of ZnF1 between ZnF1/DNB and ZnF1(-)/DNB complex. (b) Comparison of RMSF values of ZnF3 between ZnF3/DNB and ZnF3(-)/DNB complex. (c-d) The Comparison of 3D structures of ZnF1 and ZnF3 or ZnF1(-) and ZnF3(-) binding with DSB after 100 ns MD simulation. The green cartoon model is ZnF1 or ZnF3 in the system of ZnF1/ZnF3/DNB, and the yellow one is ZnF1(-) or ZnF3(-) in ZnF1(-)/ZnF3(-)/DNB. Blue and red cartoon correspond to the loop area of  $L_1$  or  $L_2$  in ZnF1/ZnF3/DNB and ZnF1(-)/ZnF3(-)/DNB, respectively. (e-f) The per-residue energy decomposition of ZnF1 in ZnF1/DNB and ZnF1(-) in ZnF1(-)/DNB and the per-residue energy decomposition of ZnF3 in ZnF3/DNB and ZnF3(-) in ZnF3(-)/DNB.

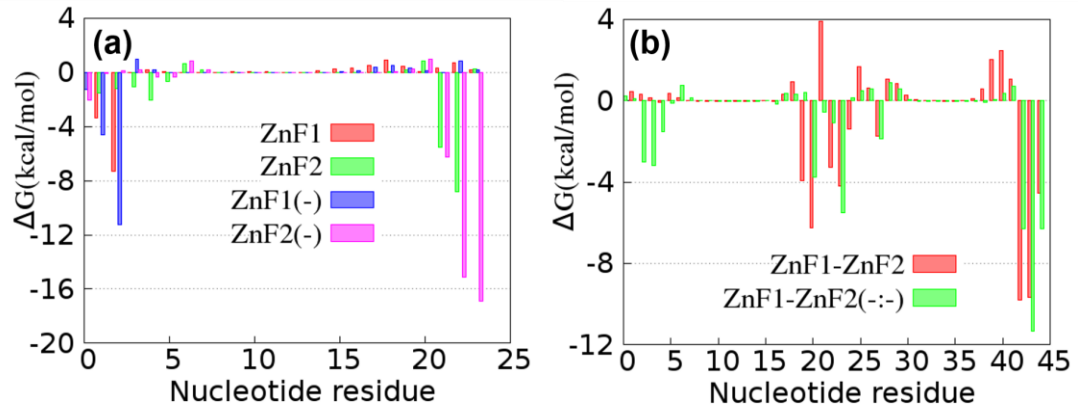

**Fig S4.** The per-nucleotide-residue energy contribution spectrum of DSB and SSB. (a) The comparison of per residue energy contribution spectrum of DSB binding with ZnF1/ZnF2/ZnF1(-)/ZnF2(-). (b) The comparison of per residue energy contribution spectrum of SSB binding with ZnF1-ZnF2 and ZnF1-ZnF2(-:-).

**Table S1.** The calculated (MM/GBSA) binding free energies of ZnF1/ZnF3/DSB and ZnF1(-)/ZnF3(-)/DSB complex

| <b>Terms</b>                       | <b>ZnF1/DSB</b> | <b>ZnF3/DSB</b> | <b>ZnF1(-)/DSB</b> | <b>ZnF3(-)/DSB</b> |
|------------------------------------|-----------------|-----------------|--------------------|--------------------|
| $\Delta E_{vdw}$ <sup>a</sup>      | -51.01          | -10.26          | -51.11             | -10.43             |
| $\Delta E_{ele}$ <sup>b</sup>      | -774.63         | -420.70         | -856.52            | -642.66            |
| $\Delta E_{polar}$ <sup>c</sup>    | 778.03          | 435.07          | 854.76             | 656.91             |
| $\Delta E_{nonpolar}$ <sup>d</sup> | -6.14           | -1.43           | -6.37              | -1.59              |
| $\Delta G$ <sup>e</sup>            | -53.75          | 2.68            | -59.24             | 2.23               |

<sup>a</sup> Van der Waals energy.

<sup>b</sup> Electrostatic energy.

<sup>c</sup> Polar solvation free energy.

<sup>d</sup> Non-polar solvation free energy.

<sup>e</sup> Calculated Gibbs free energy. All the energy terms are in Kcal/mol.
